# Supplementary material for: Role of Pink1-mediated mitophagy in adenomyosis
Source: PeerJ journal article supplement (doi:10.7717/peerj.16497), 2023-11-30
Supplement: Original_images_for_blots.zip [file Original_images_for_blots.zip]

## Sheet: Sheet1
	control(μl)	control(μl)	control(μl)	AM(μl)	AM(μl)	AM(μl)
Volume of samples（30ug）	2.77604	3.25557	5.81913	2.53865	3.20832	3.04153
